# Supplementary material for: Improving PFSA Membranes Using Sulfonated Nanodiamonds
Source: Membranes (Basel). 2023 Aug 1;13(8):712. doi: 10.3390/membranes13080712 (PMC10456736; doi:10.3390/membranes13080712)
Supplement: Supplementary file 1 [file membranes-13-00712-s001.zip › membranes-2470258-supplementary.pdf]

## Improving PFSA membranes using sulfonated nanodiamonds

Alexandr V. Shvidchenko <sup>1,\*</sup>, Alexei S. Odinokov <sup>2</sup>, Oleg N. Primachenko <sup>3</sup>, Iosif V. Gofman <sup>3</sup>, Natalia P. Yevlampieva <sup>4</sup>, Elena A. Marinenko <sup>3</sup>, Vasily T. Lebedev <sup>5</sup>, Alexander I. Kuklin <sup>6</sup> and Yuri V. Kulvelis <sup>5,\*</sup>

<sup>1</sup> Ioffe Institute, 194021 St. Petersburg, Russia

<sup>2</sup> Russian Research Center of Applied Chemistry, 193232 St. Petersburg, Russia

<sup>3</sup> Institute of Macromolecular Compounds, Russian Academy of Sciences, 199004 St. Petersburg, Russia

<sup>4</sup> Physical Faculty, St. Petersburg State University, 198504 St. Petersburg, Russia

<sup>5</sup> Petersburg Nuclear Physics Institute named by B.P. Konstantinov of National Research Center "Kurchatov Institute", 188300 Gatchina, Russia

<sup>6</sup> Frank Laboratory of Neutron Physics, Joint Institute for Nuclear Research, 141980 Dubna, Russia

\* Correspondence: avshvid@mail.ioffe.ru, kulvelis\_yv@pnpi.nrcki.ru

### Thermogravimetric analysis (TGA)

We have performed TGA tests of some Aquivion®-type membranes without diamonds: SSC-1 membrane with EW 790 g-eq/mol and SSC-2 membrane with EW 870 g-eq/mol. TGA was carried out in the temperature range 50-1000 °C for membranes SSC-1 and SSC-2 with different chemical composition (equivalent weight, EW). Thermal stability and the process of desulfonation were studied. Figure S1 shows the results of thermal-oxidative degradation of membrane copolymers in air.

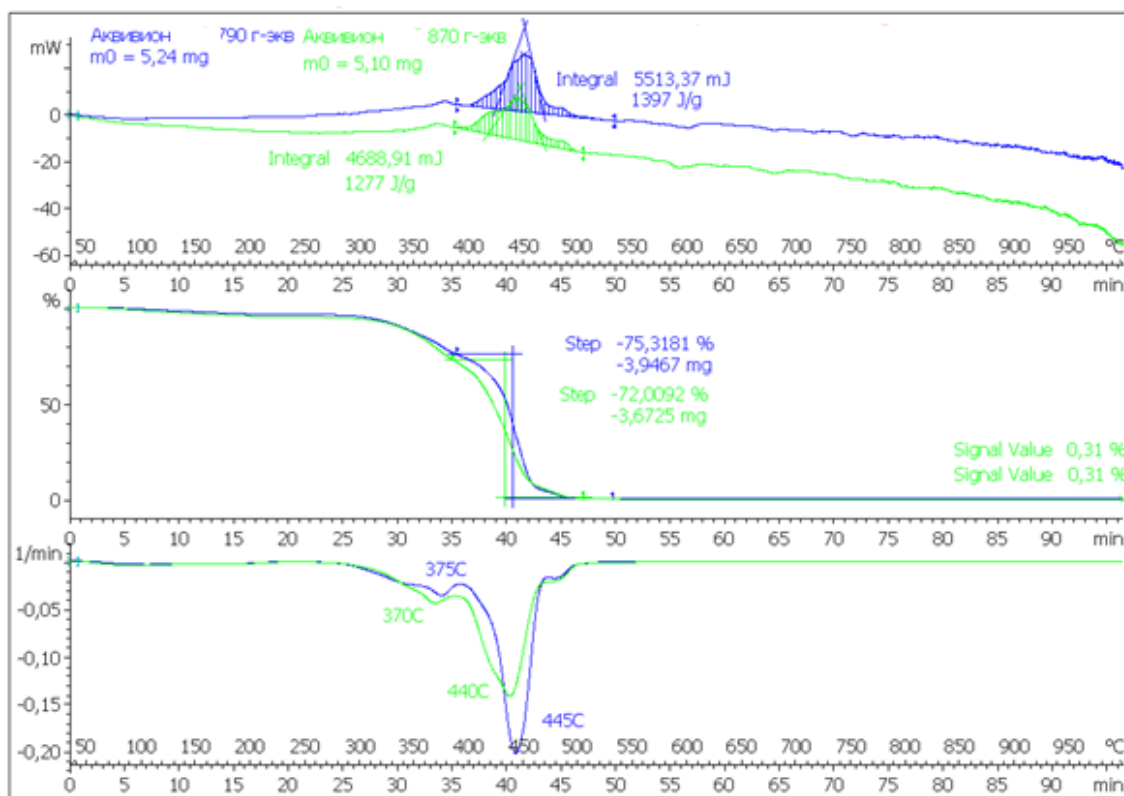

**Figure S1.** TGA tests of SSC-1 (EW 790 g-eq/mol, blue) and SSC-2 (EW 870 g-eq/mol, green) membranes.

3 main stages of membranes' destruction were identified. The total weight loss of all membranes up to 300 °C is associated with water evaporation. The weight loss at 300–400 °C is associated with desulfurization and decomposition of the side chains, and the weight loss above 400 °C is due to thermal destruction of the backbone of the copolymer.

***Scanning electron microscopy (SEM)***

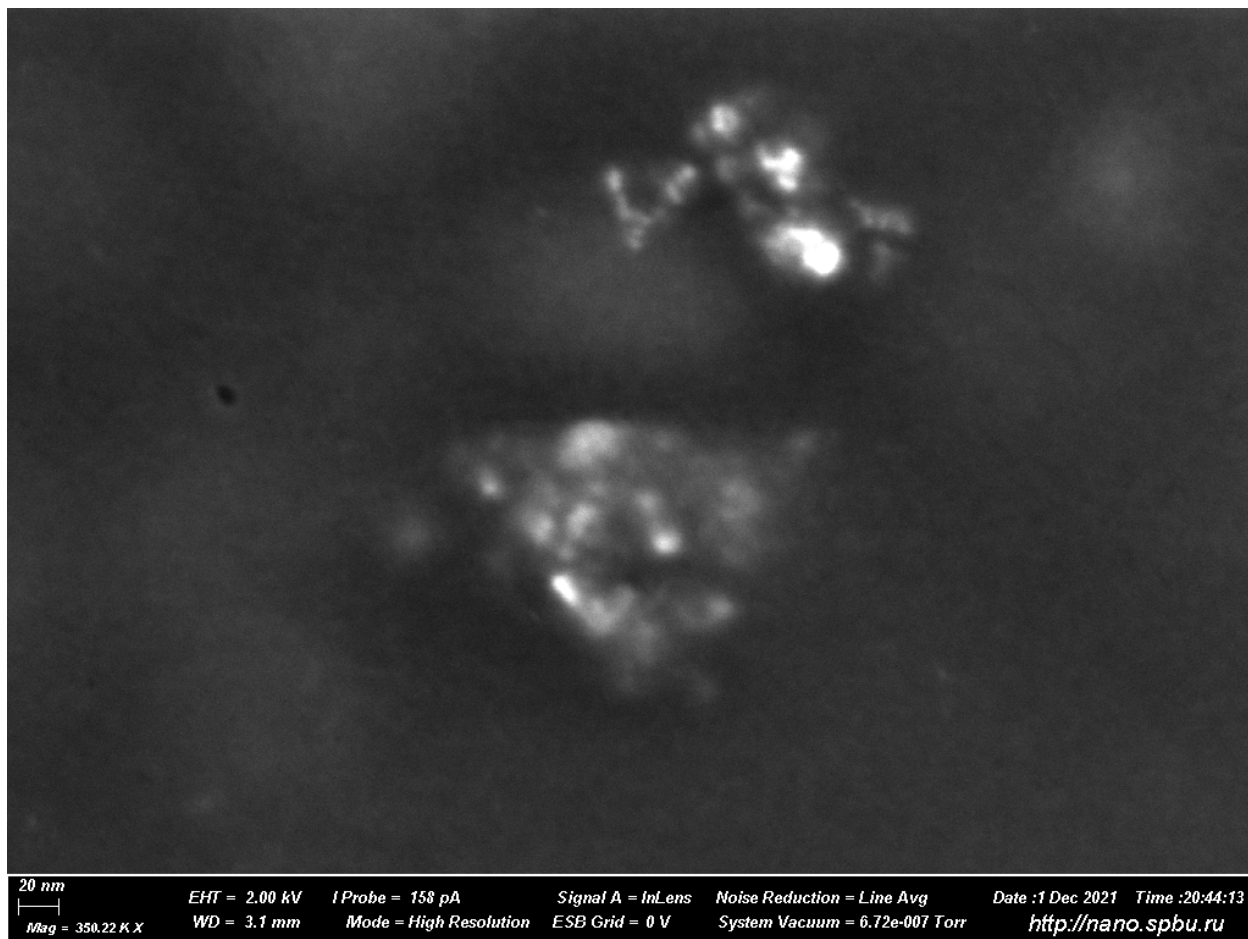

**Figure S2.** SEM image of Aquivion®-type compositional membrane with 0.5 wt.% of DND-S.

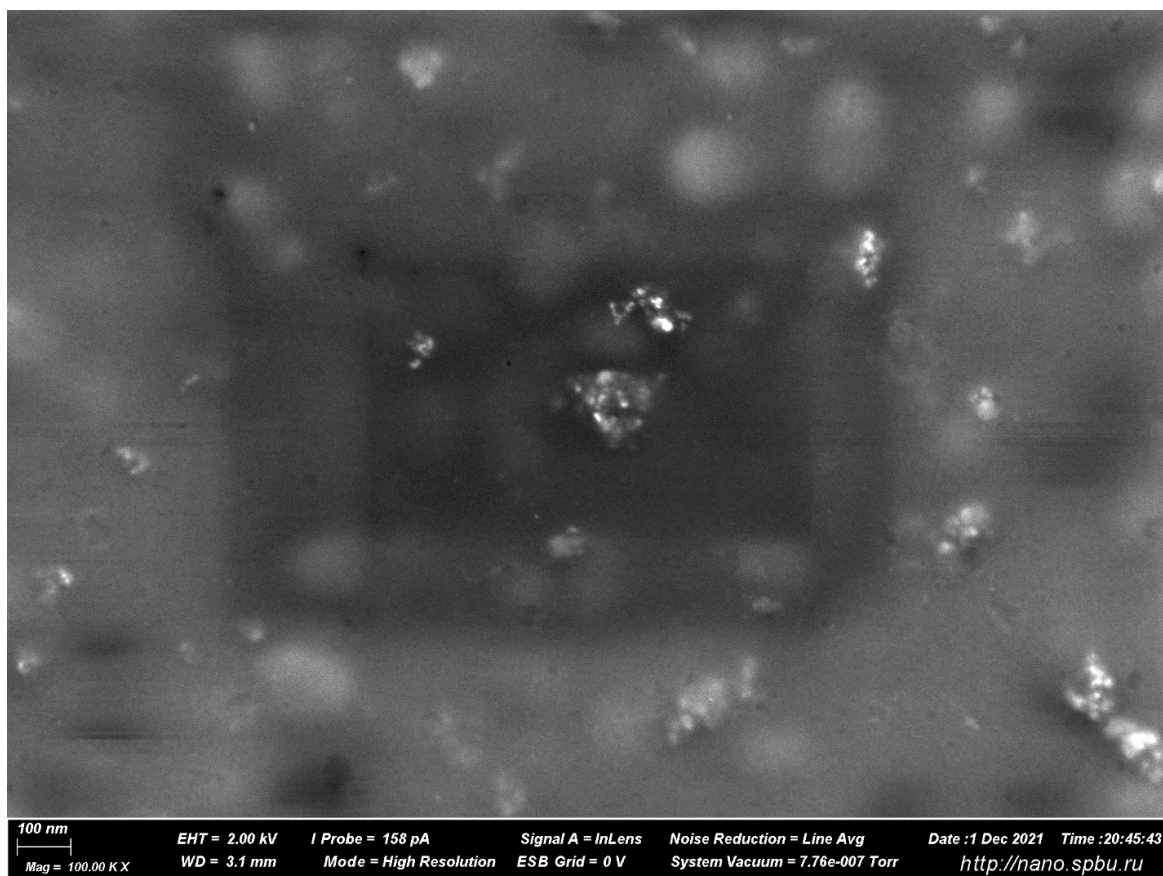

**Figure S3.** SEM image of Aquivion®-type compositional membrane with 0.5 wt.% of DND-S.

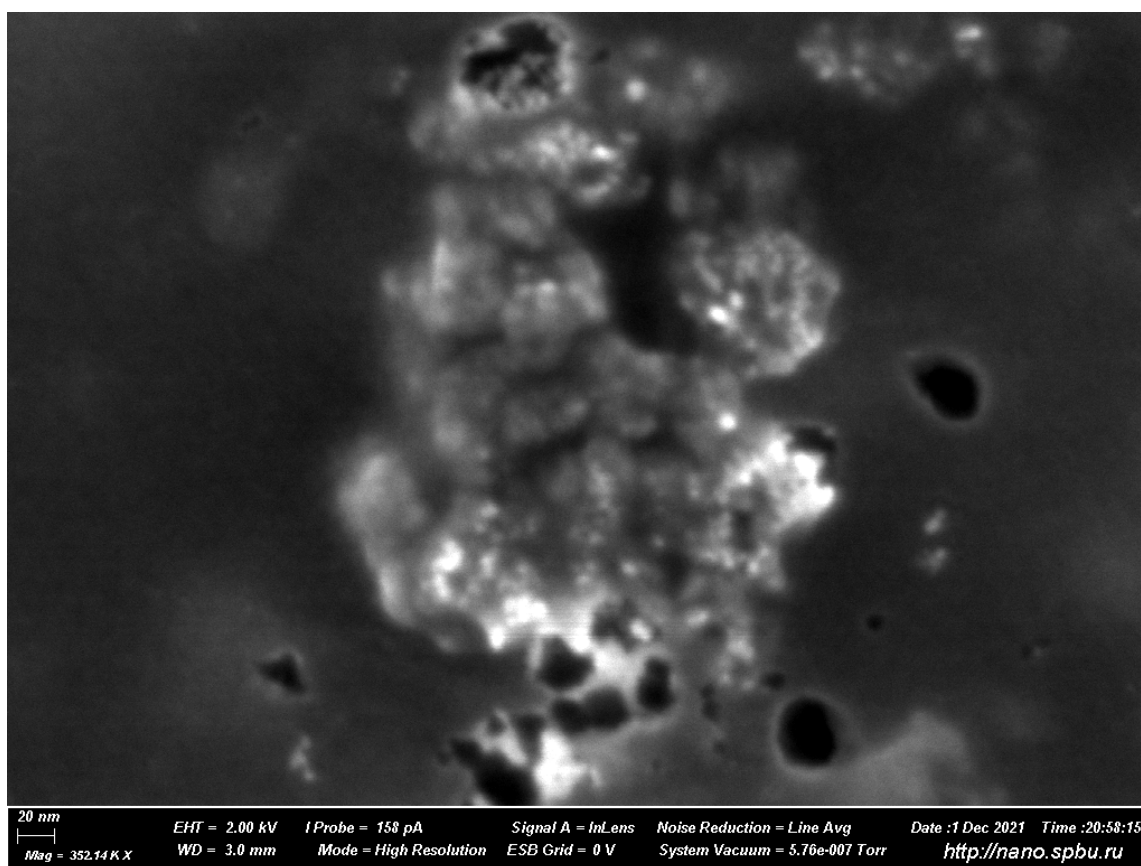

**Figure S4.** SEM image of Aquivion®-type compositional membrane with 1 wt.% of DND-S.

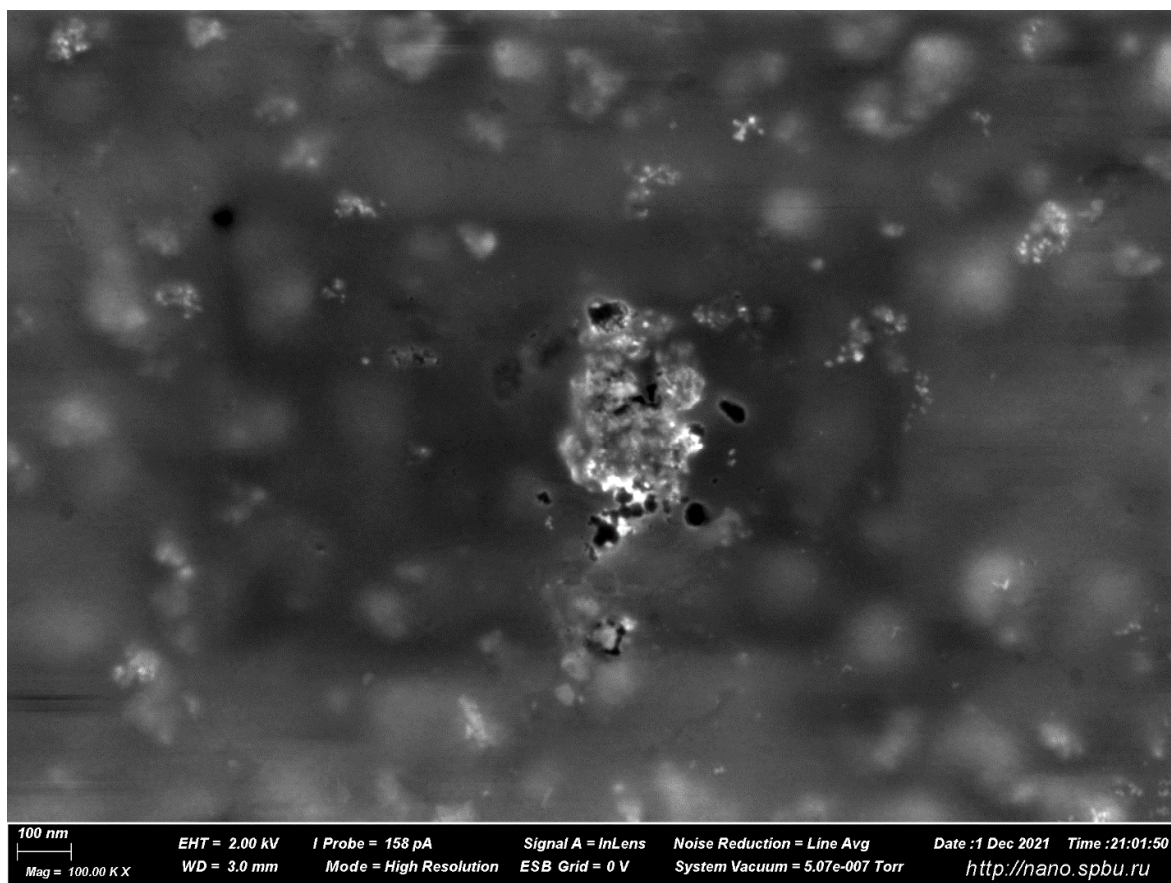

**Figure S5.** SEM image of Aquivion®-type compositional membrane with 1 wt.% of DND-S.

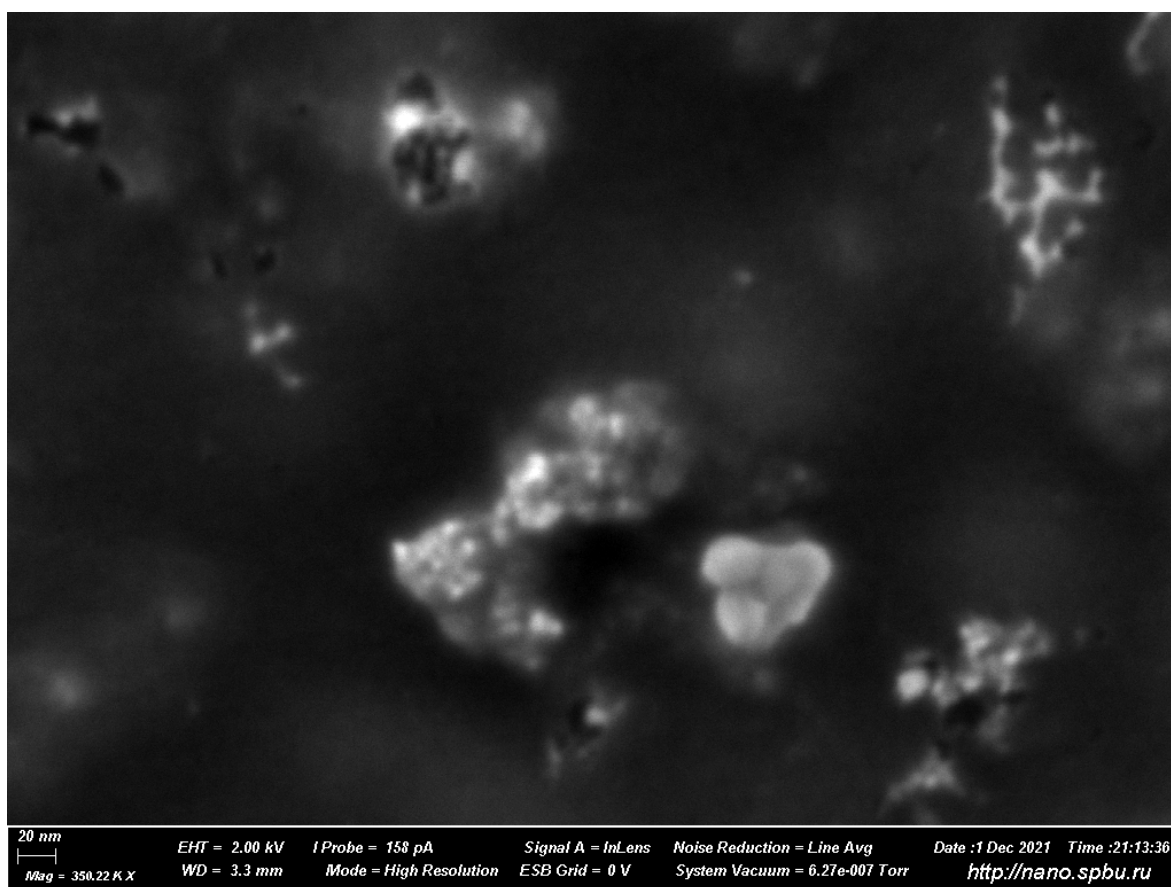

**Figure S6.** SEM image of Aquivion®-type compositional membrane with 2 wt.% of DND-S.

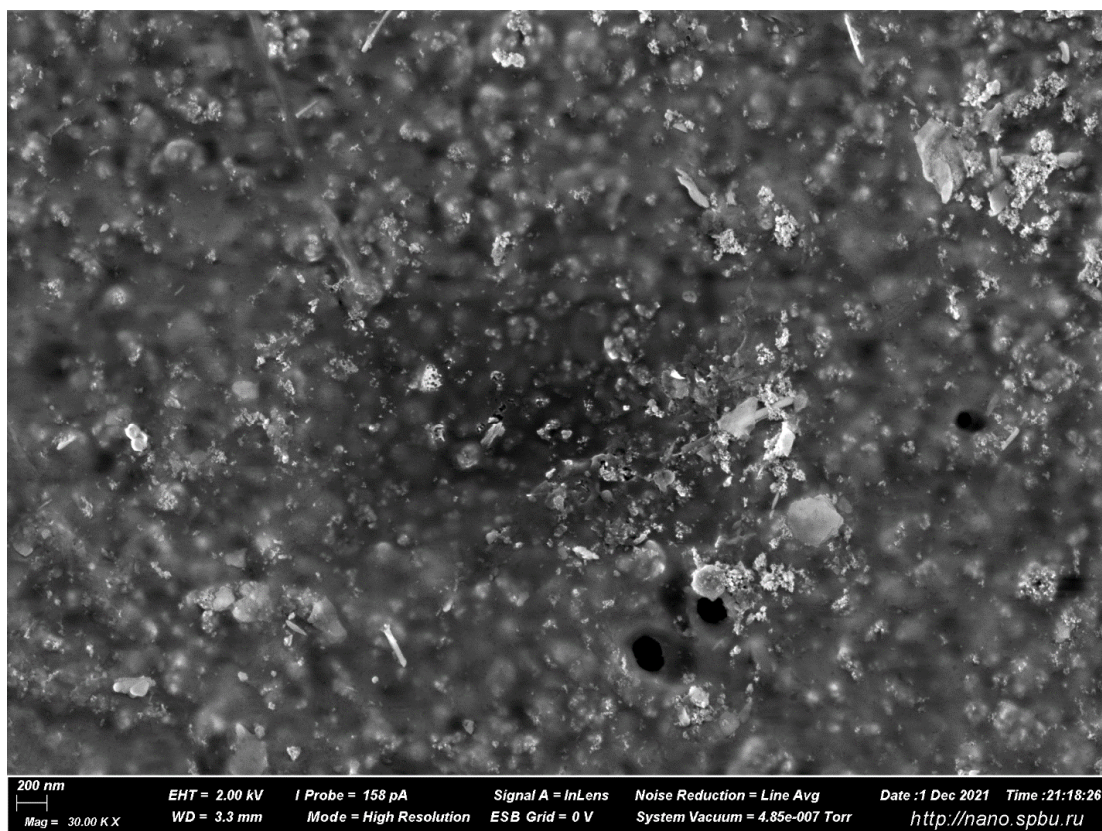

**Figure S7.** SEM image of Aquivion®-type compositional membrane with 2 wt.% of DND-S.

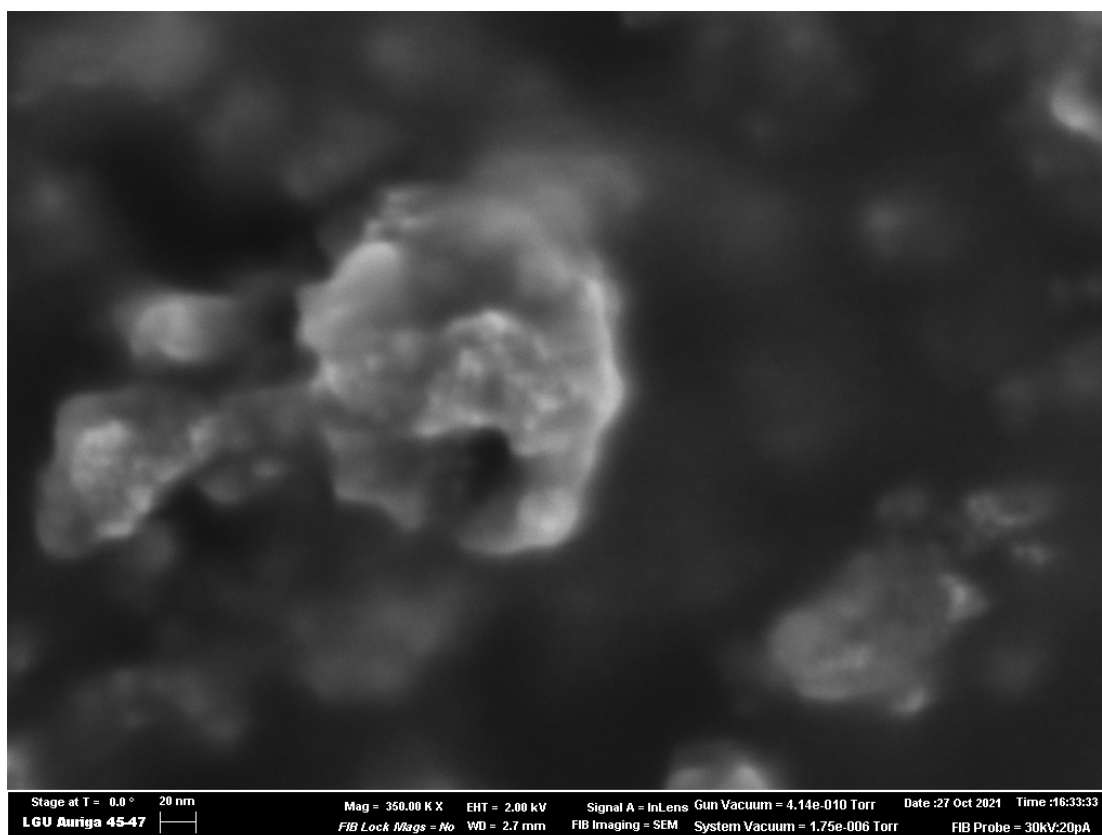

**Figure S8.** SEM image of Aquivion®-type compositional membrane with 5 wt.% of DND-S.

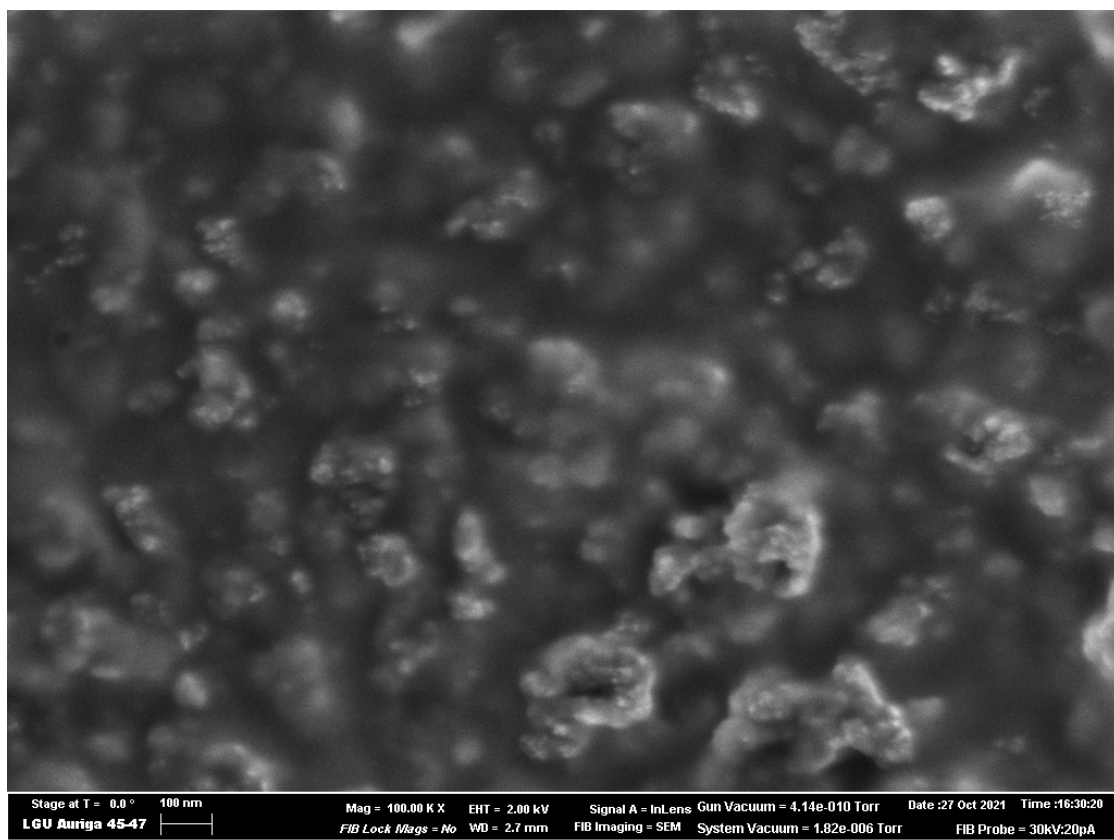

**Figure S9.** SEM image of Aquivion®-type compositional membrane with 5 wt.% of DND-S.
